# Supplementary material
Source: Frontiers journal article supplement (https://www.frontiersin.org/articles/290487)
Supplement: Image_1.pdf [file Image_1.pdf]

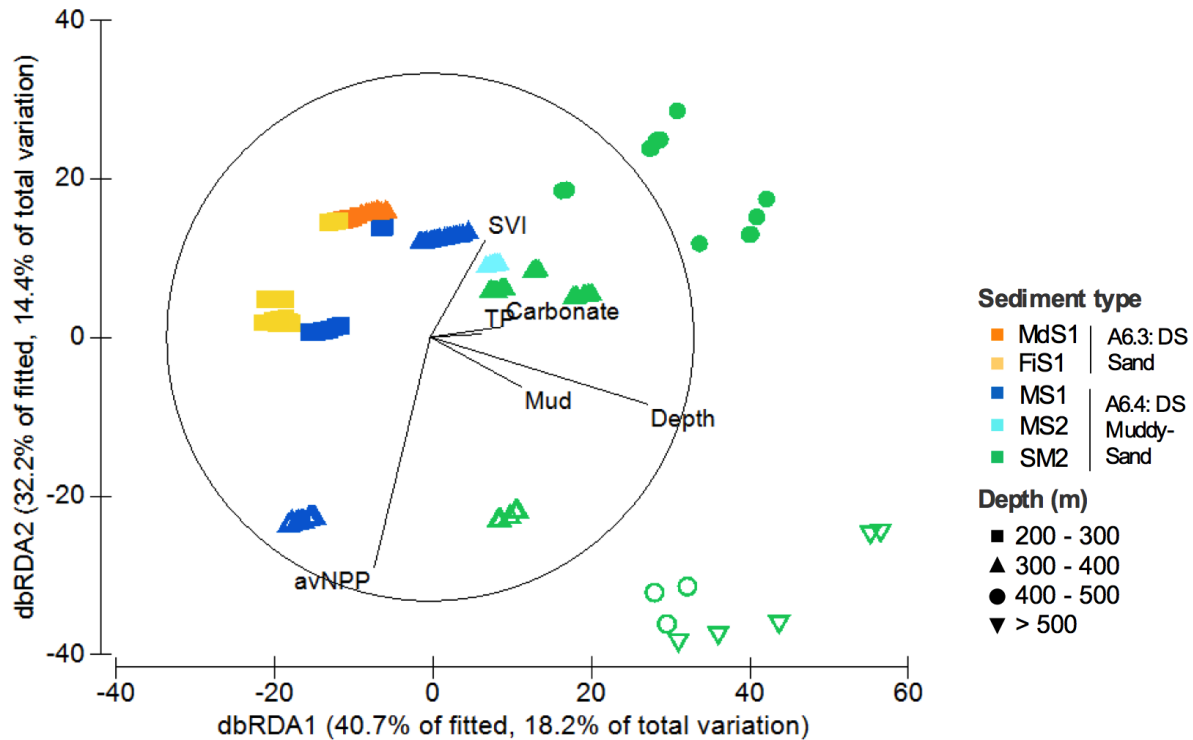

**Supplementary Figure 1 |** Distance-based redundancy (dbRDA) plot illustrating the DISTLM model exploring the relationship between megafauna community composition and environmental variables (vectors). Environmental parameters included in the analysis were: depth (m); sediment type (categorical variable determined by the mud and carbonate content, indicated as vectors); average net primary production (avNPP); seasonal variation index (SVI) and annual trawling pressure (TP;  $\text{h.cell}^{-1}.\text{y}^{-1}$ ). MdS1: medium sand; FiS1: fine sand; MS1: muddy-sand with <30% carbonate content; MS2: muddy-sand with 30–50% carbonate content; SM2: sandy-mud. Closed symbols: 2013 segments; Open symbols: 2014 segments.
